# Supplementary material
Source: Springer Nature journal article supplement (https://www.springermedizin.de/resource/supplementary/12967_2009_383_MOESM3_ESM.pdf/9576352)

# Donor 2 (HLA-A\*0201/2402)

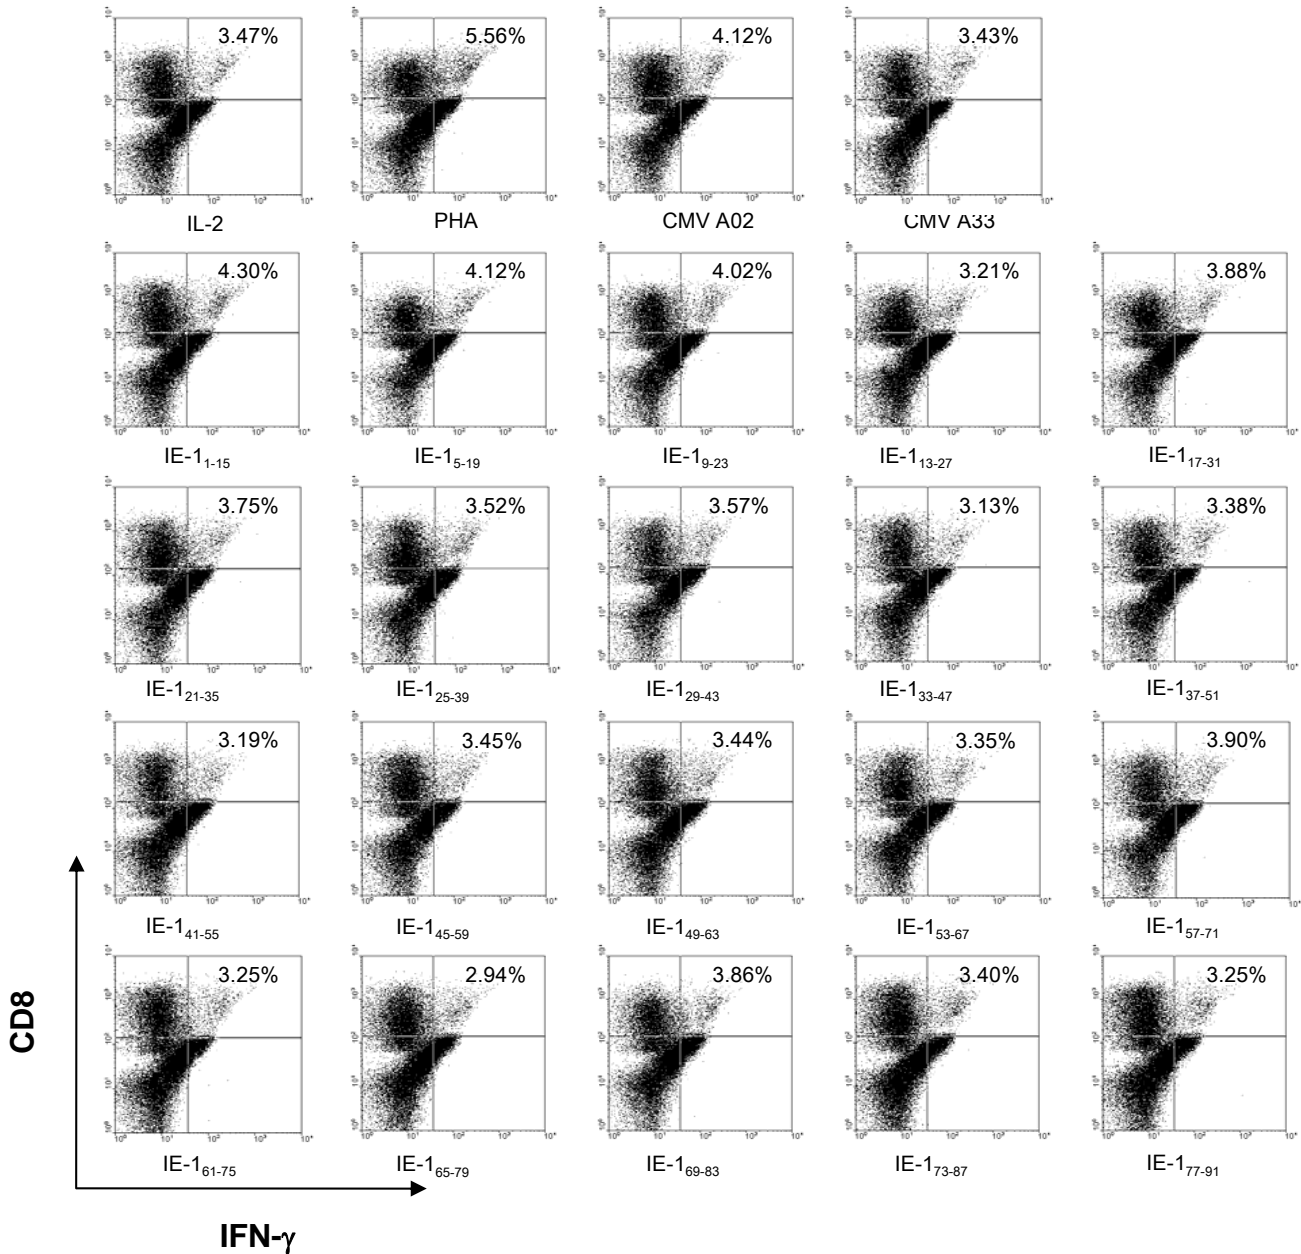

Supplement: MOESM3 [file 9576352]
